# Supplementary material for: Reaction mechanisms for electrolytic manganese dioxide in rechargeable aqueous zinc-ion batteries
Source: PubMed Central journal article supplement (PMC8531032; doi:10.1038/s41598-021-00148-2), 2021-10-21
Supplement: 41598_2021_148_MOESM1_ESM.pdf [file 41598_2021_148_MOESM1_ESM.pdf]

## SUPPORTING INFORMATION

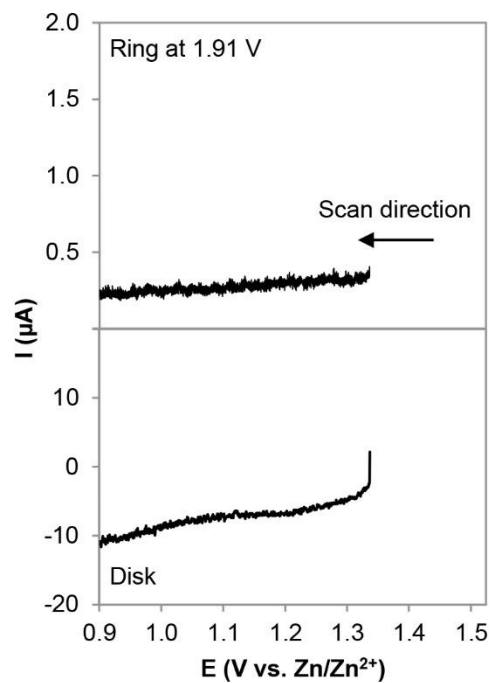

**Figure S1.** RRDE profiles of hetaerolite recorded at  $1 \text{ mV s}^{-1}$  in an Ar-saturated  $1 \text{ M ZnSO}_4$  solution, stirred at 900 rpm with the Pt ring maintained at 1.91 V vs  $\text{Zn}/\text{Zn}^{2+}$ .

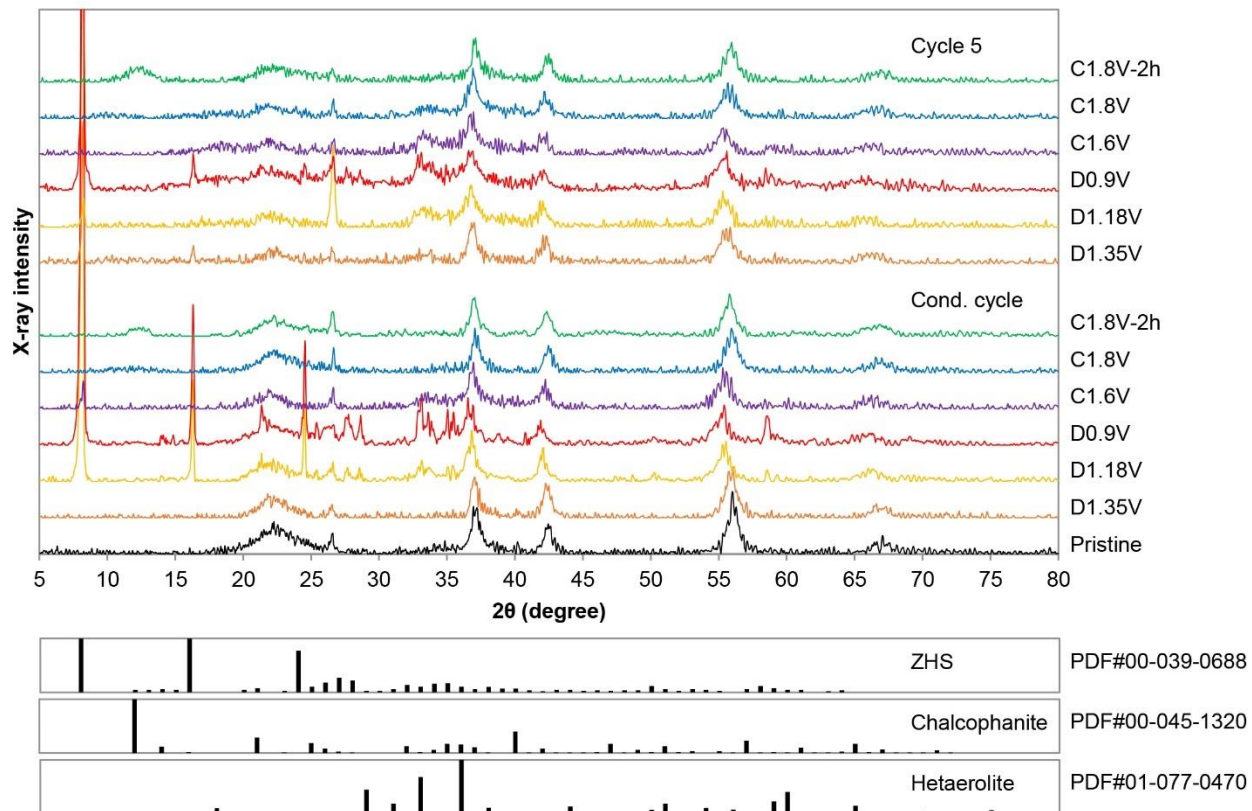

**Figure S2.** XRD patterns of EMD electrodes at different potentials during GCD tests with the conditioning cycle at  $0.5 \text{ mA cm}^{-2}$  and the 5th cycle at  $1 \text{ mA cm}^{-2}$ . Reference PDF cards for ZHS, chalcophanite, and hetaerolite are included at the bottom of the XRD patterns. Discharge and charge processes are denoted as D and C, respectively.

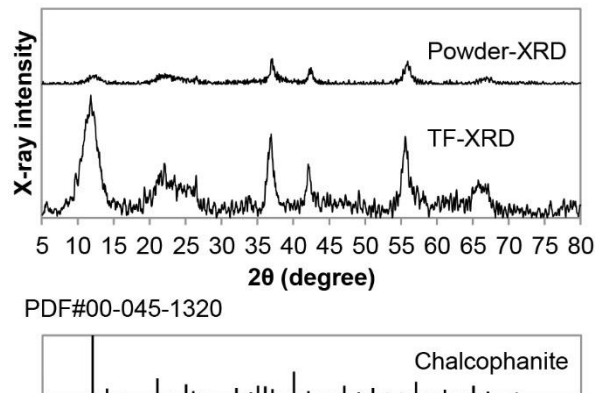

**Figure S3.** Powder XRD and TF-XRD patterns of the EMD electrode after CV cycling at 1.8 V for 2 h. The electrodes were washed with 1 mM AA. The PDF card for chalcophanite is included.

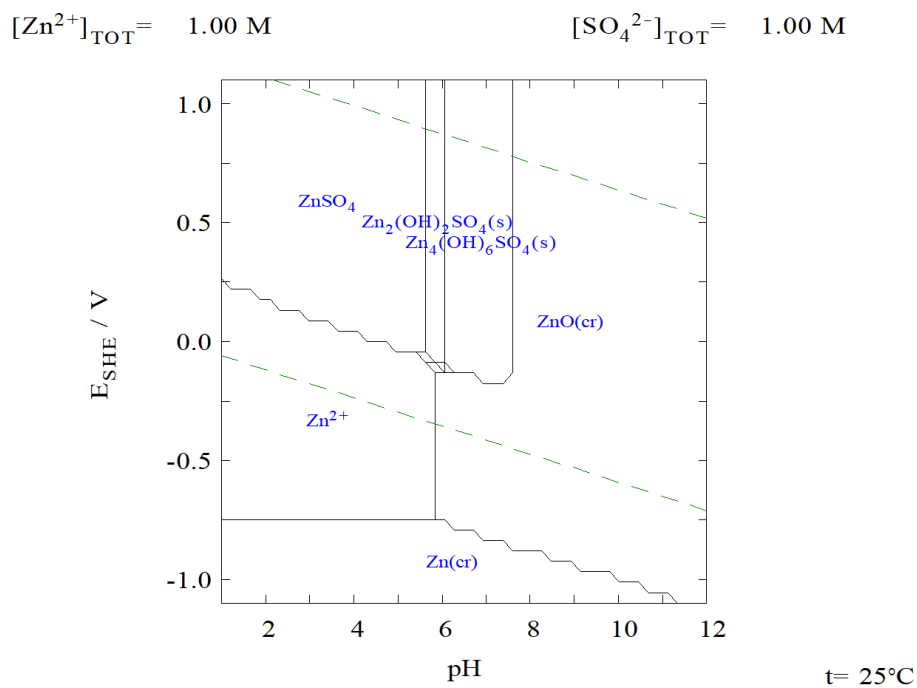

**Figure S4.** Pourbaix diagram for  $\text{ZnSO}_4$  at ion concentrations of 1.00 M.

**Table S1.** Indexed d-spacings for the SAED pattern in Figure 5a and d-spacings from the PDF card for hetaerolite (PDF#01-077-0407)

| Measured d-spacing (Å) | Hetaerolite ZnMn <sub>2</sub> O <sub>4</sub> d-spacing (Å) | (hkl) |
|------------------------|------------------------------------------------------------|-------|
| 4.87                   | 4.86                                                       | (101) |
| 2.93                   | 3.04                                                       | (112) |
| 2.74                   | 2.71                                                       | (103) |
| 2.44                   | 2.46                                                       | (211) |
| 2.43                   | 2.43                                                       | (202) |
| 2.01                   | 2.02                                                       | (220) |
| 1.80                   | 1.80                                                       | (204) |
| 1.66                   | 1.68                                                       | (312) |
| 1.56                   | 1.56                                                       | (321) |
| 1.55                   | 1.52                                                       | (224) |
| 1.22                   | 1.22                                                       | (404) |
| 1.20                   | 1.20                                                       | (325) |
| 1.10                   | 1.10                                                       | (415) |
| 1.00                   | 1.00                                                       | (514) |

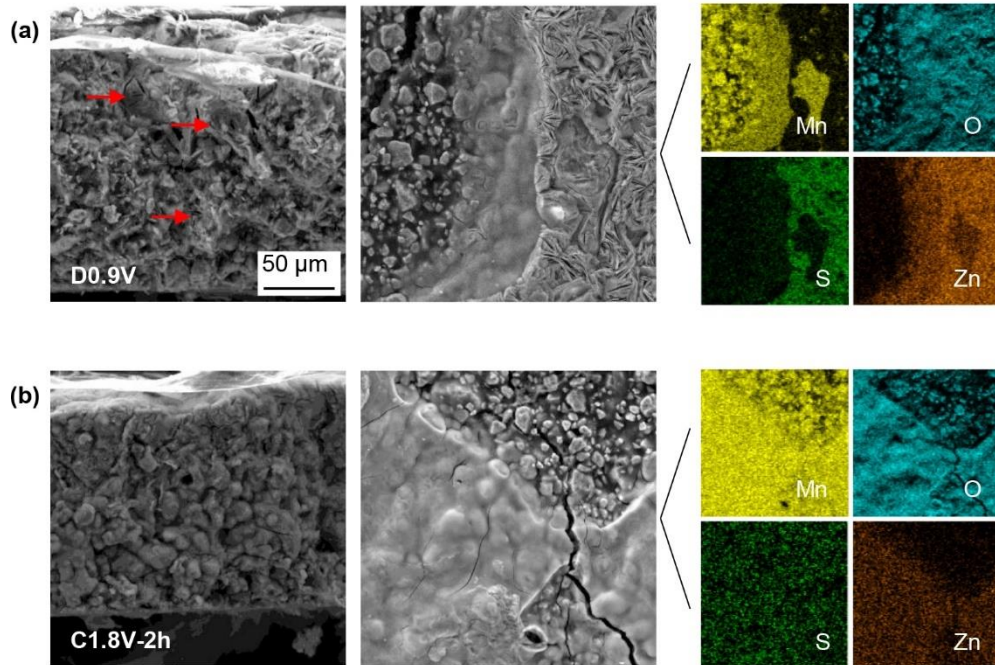

**Figure S5.** SEM SE images and EDX maps of EMD electrodes after 50 cycles: **(a)** After discharging to 0.9 V and **(b)** after charging and holding at 1.8 V. From left to right: cross section image, plan view image, and corresponding EDX maps. The red arrows indicate ZHS regions.
